# Supplementary material
Source: HighWire-hosted journal article supplement (http://molpharm.aspetjournals.org/highwire/filestream/77063/field_highwire_adjunct_files/0/MOL47985erratum___willbe.pdf)
Supplement: MOL47985erratum___willbe.pdf [file MOL47985erratum___willbe.pdf]

# Correction to “Hydrogen Sulfide Inhibits Rotenone-Induced Apoptosis via Preservation of Mitochondrial Function”

In the above article [Hu LF, Lu M, Wu ZY, Wong PTH, and Bian JS (2009) *Mol Pharmacol* 75:27–34], Fig. 7a, Fig. 8b, and the top panel of Fig. 9a are incorrect. The corrected figures are shown below.

The online version of this article will be corrected in departure from the print version.

The authors regret this error and apologize for any confusion or inconvenience it may have caused.

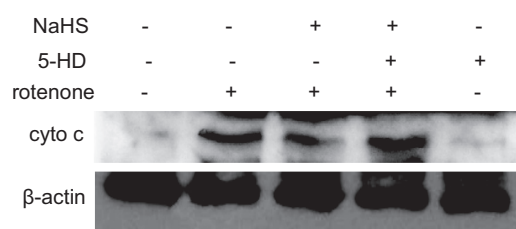

**Fig. 7a.**

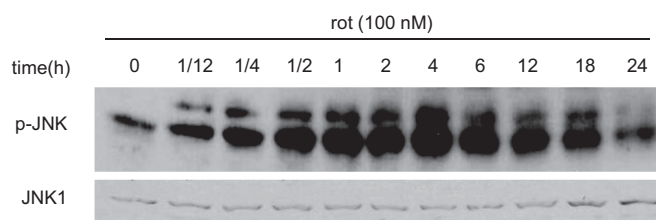

**Fig. 8b.**

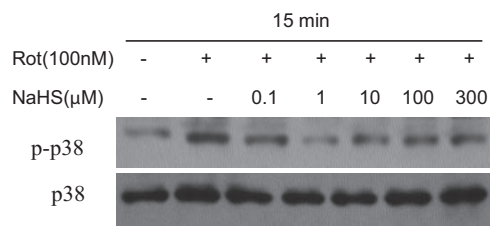

**Fig. 9a. Top panel.**
